# Supplementary material for: Promoting hygienic weaning food handling practices through a community-based programme: intervention implementation and baseline characteristics for a cluster randomised controlled trial in rural Gambia
Source: PubMed Central journal article supplement — BMJ Open. 2018 Aug 5;8(8):e017573. doi: 10.1136/bmjopen-2017-017573 (PMC6078275; doi:10.1136/bmjopen-2017-017573), 2018-08-05
Supplement: bmjopen-2017-017573supp001.pdf [file bmjopen-2017-017573supp001.pdf]

**On-line annex Supplementary file 1:**

**Trial Sample size:** Observations during the formative research indicated that the proportion of events in which correct behaviour was displayed (i.e. practices of heating stored food, hand washing with soap before food preparation, during food preparation if contaminated, and before feeding the baby (measured the first time activity occurred)) was 17/150 (11.3%). As this was to be a cluster RCT, we assumed an intracluster correlation coefficient (ICC) of 0.04<sup>14</sup> between villages and a coefficient variation of cluster size 0.22. With a significance level of 5%, we aimed to detect a minimum of 25% absolute increase in behaviour in the intervention compared to the control arms with 95% power. As we were able to recruit 15 clusters per arm, a minimum of 12 mothers per cluster was required.<sup>15</sup> We aimed to recruit 20 mothers within each village at outcome evaluation to guard against loss of mothers during the eight hour observation by female fieldworkers during evaluation home visits. In a sensitivity analysis, assuming a larger ICC of 0.1, the power (84%) remained reasonable.
